# Supplementary material for: Mannitol Polymorphs as Carrier in DPIs Formulations: Isolation Characterization and Performance
Source: MDPI journal article supplement (doi:10.3390/pharmaceutics13081113), 2021-07-21
Supplement: s1 [file s1]

# Supplementary Materials: Mannitol Polymorphs as Carrier in DPIs Formulations: Isolation Characterization and Performance

Ayça Altay Benetti, Annalisa Bianchera, Francesca Buttini, Laura Bertocchi and Ruggero Bettini

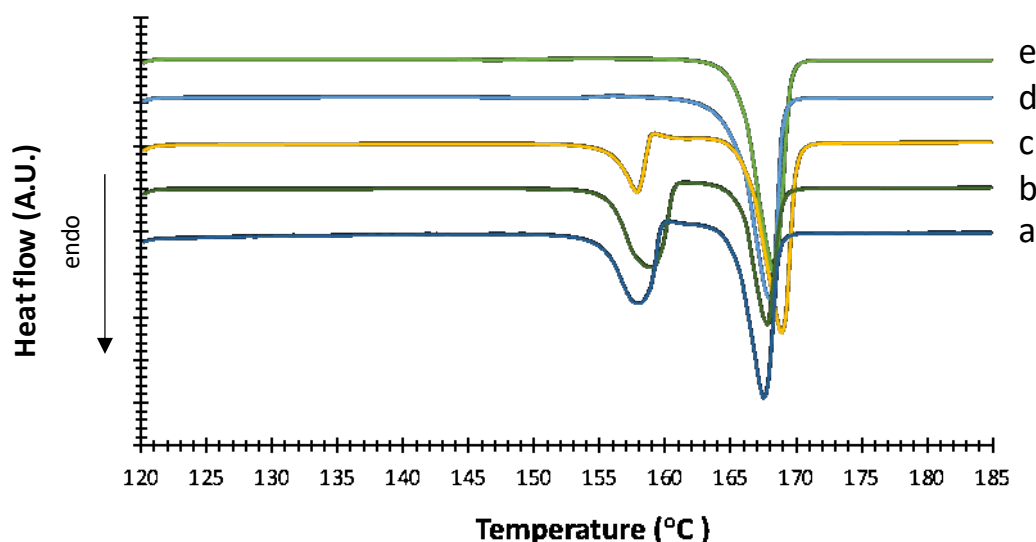

**Figure S1.** DSC traces mannitol powders supposed to be  $\delta$  form: crystallized with (a) 3% PVP, (b) 2 % PVP, (c) 1% PVP, (d) 0.5% PVP, (e) without PVP.

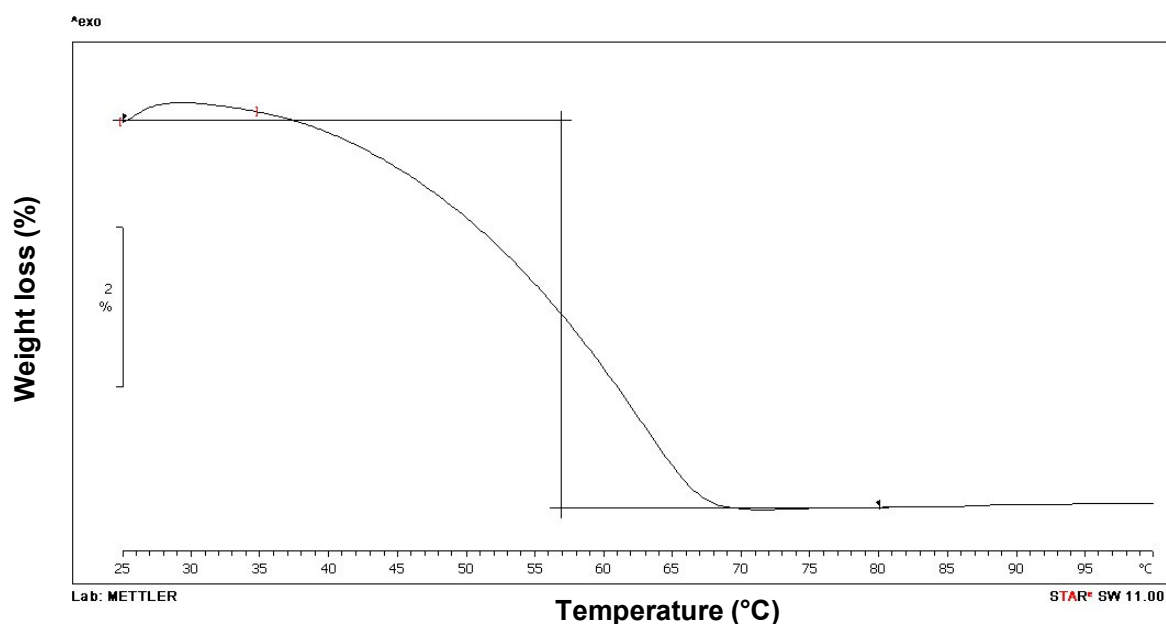

**Figure S2.** TGA trace of mannitol hemihydrate.

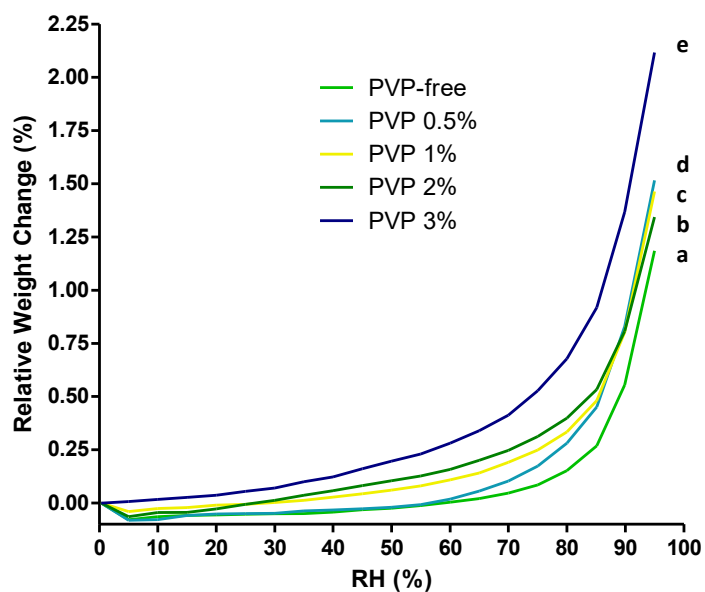

**Figure S3.** Dynamic vapor sorption curves of mannitol powders supposed to be  $\delta$  form: crystallized with (e) 3% PVP, (d) 2% PVP, (c) 1% PVP, (b) 0.5% PVP and (a) without PVP K30.

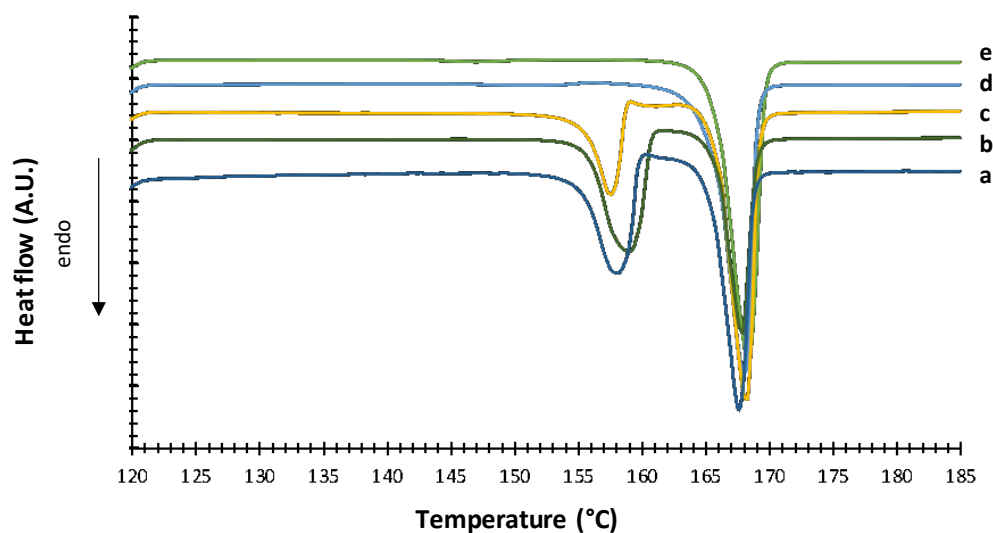

**Figure S4.** DSC traces mannitol powders supposed to be  $\delta$  form tested after DVS analysis: crystallized with (a) 3% PVP, (b) 2 % PVP, (c) 1% PVP, (d) 0.5% PVP, (e) without PVP.

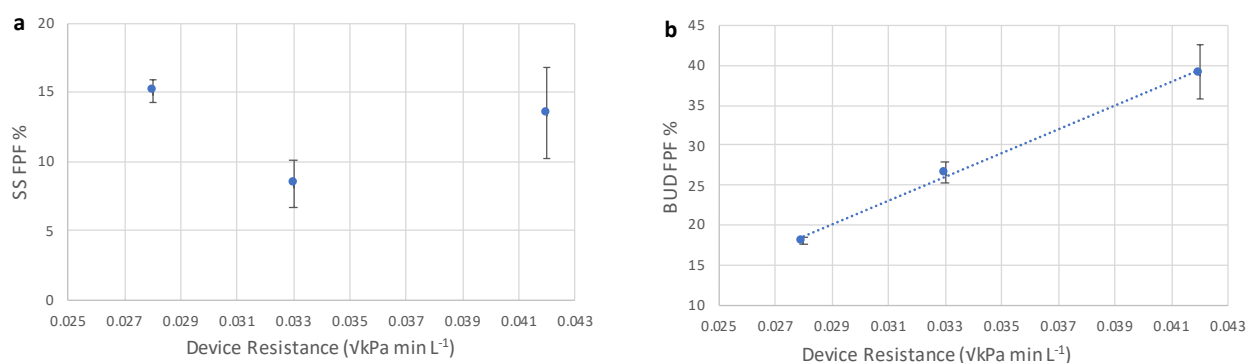

**Figure S5.** Fine particle fraction of salbutamol sulphate (a) and budesonide (b) as a function of the resistance of the device used for aerosolizing adhesive binary mixture with lactose MM50. Data for resistance 0.042 and 0.033: present work; data for resistance 0.028: from Della Bella et al. [18].

**Table S1.** Relevant peaks in supposed  $\alpha$  forms with respect to reference from CCDC.

| Alpha CCDC     |                 | Methanol       |                 | 1% PVA         |                 | 2% PVA         |                 |
|----------------|-----------------|----------------|-----------------|----------------|-----------------|----------------|-----------------|
| 2 $\theta$ (°) | Intensity (cps) |
| 8.91           | 114.7           |                |                 |                |                 | 9.55           | 810             |
| 10.45          | 75.5            |                |                 |                |                 | 10.8           | 442.5           |
| 13.17          | 373             |                |                 | 12.9           | 485.5           | 13.5           | 253.1           |
| 16.77          | 1000            |                |                 | 16.5           | 495.2           | 17.1           | 659.6           |
| 18.23          | 764.9           | 17.75          | 264.7           | 17.95          | 257             | 18.55          | 188.4           |
| 19.35          | 612             | 19.43          | 56.5            | 19.08          | 931.6           | 19.7           | 1000            |
| 19.91          | 691.8           | 20.08          | 155.5           | 19.63          | 1000            | 20.25          | 973.2           |
| 20.17          | 56.4            |                |                 |                |                 |                |                 |
| 20.85          | 614.8           | 22.38          | 1000            | 20.55          | 547.1           | 21.15          | 462.9           |
|                |                 |                |                 |                |                 | 21.9           | 1278.5          |
| 23.95          | 13.8            | 23.65          | 20.5            | 22.6           | 119.7           | 24.55          | 1742.5          |
| 24.63          | 328.7           | 24.9           | 60              | 24.33          | 214.6           | 24.95          | 142.6           |
| 25.19          | 53.4            |                |                 |                |                 |                |                 |
| 25.79          | 33.6            |                |                 | 26.18          | 317.1           |                |                 |
| 26.51          | 278.9           |                |                 | 26.7           | 288.3           | 26.8           | 27.1            |
| 27.03          | 170.4           | 27.27          | 204.6           |                |                 |                |                 |
| 27.65          | 419.9           |                |                 | 27.33          | 343.7           | 27.35          | 197.1           |
| 28.15          | 80.9            | 28.45          | 297             |                |                 | 27.95          | 192             |
| 30.09          | 65.8            |                |                 | 29.58          | 196.4           | 30.2           | 114.6           |
| 30.57          | 43.8            | 30.57          | 250             | 30.7           | 223.7           | 31.3           | 121.4           |
| 31.11          | 64.4            | 31.65          | 55.6            | 32.33          | 410.7           | 32.95          | 217.4           |
| 32.65          | 294.7           | 32.5           | 319.4           | 33.13          | 257.8           | 33.75          | 141.5           |
| 33.45          | 232.7           | 33.18          | 25.1            | 34.75          | 245.4           |                |                 |

**Table S2.** Relevant peaks in supposed  $\beta$  forms with respect to reference from CCDC.

| Beta CCDC      |                 | Beta freeze-drying |                 | Beta acetone   |                 |
|----------------|-----------------|--------------------|-----------------|----------------|-----------------|
| 2 $\theta$ (°) | Intensity (cps) | 2 $\theta$ (°)     | Intensity (cps) | 2 $\theta$ (°) | Intensity (cps) |
| 10.11          | 116.1           |                    |                 | 9.64           | 434.3           |
| 11.09          | 27.8            |                    |                 | 10.46          | 104.8           |
| 14.27          | 461.2           | 13.14              | 190.1           | 14.64          | 344.7           |
| 16.41          | 354.3           | 16.73              | 718.2           | 17.89          | 98.1            |
| 18.41          | 878.7           | 18.21              | 539.9           | 18.74          | 780.7           |
| 18.71          | 157.1           |                    |                 |                |                 |
| 19.29          | 36.8            | 19.31              | 749.6           | 19.46          | 109.2           |
| 20.09          | 422.1           | 19.86              | 1000            | 20.41          | 436.5           |
| 20.77          | 589.3           | 20.71              | 738.4           | 21.09          | 425.2           |
| 21.33          | 282.8           |                    |                 | 21.66          | 75.3            |
| 22.09          | 9.1             |                    |                 |                |                 |

|       |       |       |       |       |       |
|-------|-------|-------|-------|-------|-------|
| 23.07 | 1000  | 22.84 | 442   | 23.39 | 1000  |
| 24.35 | 154.2 | 24.61 | 272.4 | 24.64 | 181.9 |
| 25.55 | 140.8 | 26.44 | 233.9 | 25.22 | 133.9 |
| 26.21 | 76.7  | 26.96 | 225.7 | 25.89 | 110.8 |
| 27.99 | 111.7 | 27.59 | 323.7 | 28.29 | 150.4 |
| 29.15 | 306.1 | 28.94 | 140.5 | 29.49 | 371   |
| 30.21 | 25.5  |       |       |       |       |
| 31.01 | 58.4  | 30.94 | 162   |       |       |
| 31.43 | 61.8  |       |       | 31.77 | 122   |
| 32.35 | 80.9  |       |       | 32.66 | 104   |
| 33.25 | 172.3 | 32.59 | 298.9 |       |       |
| 33.47 | 123.8 | 33.39 | 212.5 | 33.54 | 269   |
| 33.89 | 238.4 |       |       |       |       |
| 34.59 | 63.8  |       |       | 34.62 | 66    |

**Table S3.** Relevant peaks in supposed  $\delta$  forms with respect to reference from CCDC.

| Delta CCDC     |                 | Acetone        |                 | 0.5% PVP       |                 | 1% PVP         |                 | 2% PVP         |                 | 3% PVP         |                 |
|----------------|-----------------|----------------|-----------------|----------------|-----------------|----------------|-----------------|----------------|-----------------|----------------|-----------------|
| 2 $\theta$ (°) | Intensity (cps) |
| 9.35           | 773.3           | 9.38           | 1000            | 9.5            | 1000            | 9.33           | 1000            | 9.25           | 1000            | 9.18           | 419.2           |
|                |                 | 16.93          | 36.2            | 13.43          | 43.6            |                |                 |                |                 |                |                 |
|                |                 |                |                 | 17.05          | 142.9           |                |                 |                |                 |                |                 |
|                |                 |                |                 | 18.5           | 45.4            |                |                 |                |                 |                |                 |
| 19.11          | 110.6           | 19.1           | 314.9           | 19.25          | 252             | 19.05          | 341.1           | 18.98          | 483             | 18.9           | 308.7           |
| 19.47          | 82              |                |                 |                |                 | 19.98          | 847.3           | 19.93          | 874.2           | 19.83          | 1000            |
| 20.07          | 1000            | 20.05          | 905             | 20.18          | 860.5           |                |                 |                |                 |                |                 |
| 20.75          | 343.8           | 20.75          | 232.9           | 20.9           | 321.9           | 20.7           | 262.4           | 20.65          | 265.1           | 20.58          | 357.7           |
| 20.91          | 306.6           |                |                 |                |                 |                |                 |                |                 |                |                 |
| 21.75          | 330             | 21.7           | 402.2           | 21.85          | 345.3           | 21.65          | 390.9           | 21.58          | 426.5           | 21.5           | 472.4           |
| 22.39          | 44.2            | 22.35          | 24.9            | 22.48          | 30.2            | 22.3           | 37.4            | 22.25          | 38.9            | 22.18          | 47.3            |
| 22.55          | 22.8            | 22.98          | 20.8            |                |                 |                |                 |                |                 |                |                 |
| 24.33          | 411.1           | 24.3           | 548.7           | 24.45          | 476.3           | 24.25          | 532.4           | 24.18          | 638.6           | 24.1           | 667.5           |
| 25.05          | 378.4           | 24.9           | 425.8           | 25.02          | 477.1           | 24.85          | 520.8           | 24.77          | 583.8           | 24.73          | 749.2           |
| 27.55          | 138.4           | 27.5           | 204             | 27.65          | 197.8           | 27.45          | 200.1           | 27.38          | 252.8           | 27.3           | 269.6           |
| 28.19          | 11.8            |                |                 | 28.25          | 29.3            | 28             | 15.4            | 27.98          | 23.3            | 27.88          | 25.5            |
| 29.01          | 23.5            | 29             | 57.5            | 29.15          | 36.2            | 28.95          | 57.2            | 28.85          | 88.8            | 28.77          | 73.1            |
| 31.83          | 44.6            | 31.73          | 68.9            | 31.85          | 67.1            | 31.68          | 80.3            | 31.6           | 106.6           | 31.52          | 114.6           |
| 34.63          | 100.7           | 34.65          | 85.5            | 34.75          | 67.7            | 34.55          | 120.1           |                |                 | 34.43          | 197.4           |

**Table S4.** Relevant peaks in supposed hydrate forms with respect to reference from CCDC.

| Idrato CCD     |                 | Without CaCl <sub>2</sub> |                 | With CaCl <sub>2</sub> |                 |
|----------------|-----------------|---------------------------|-----------------|------------------------|-----------------|
| 2 $\theta$ (°) | Intensity (cps) | 2 $\theta$ (°)            | Intensity (cps) | 2 $\theta$ (°)         | Intensity (cps) |
| 9.54           | 1000            | 9.19                      | 1000            | 9.25                   | 1000            |
| 9.94           | 68.4            |                           |                 |                        |                 |
| 10.36          | 83.5            |                           |                 |                        |                 |
|                |                 | 14.75                     | 814             | 14.85                  | 970             |
| 16.56          | 164.2           | 16.16                     | 235.5           | 16.18                  | 182.9           |
| 17.3           | 58.1            | 17.54                     | 678.4           | 17.55                  | 472.9           |
| 17.98          | 911.1           | 18.44                     | 518.8           | 17.58                  | 472.4           |
| 19             | 637.4           | 18.81                     | 210.7           | 18.58                  | 294.3           |
| 19.4           | 568.3           | 19.54                     | 583.8           | 19.58                  | 389.7           |
| 19.98          | 512.5           | 20.06                     | 288             | 20.18                  | 201.4           |
| 20.8           | 138             | 20.74                     | 225.9           |                        |                 |
| 21.76          | 104.3           | 22.66                     | 411.5           | 22.8                   | 298             |
| 23.14          | 514.9           | 23.01                     | 258.7           |                        |                 |
| 25.24          | 187.4           | 24.84                     | 409.6           |                        |                 |
| 25.86          | 258.2           | 25.31                     | 538.4           | 25.38                  | 503.5           |
| 26.08          | 102.5           | 26.61                     | 425.8           | 26.68                  | 351.1           |

|       |       |       |       |       |       |
|-------|-------|-------|-------|-------|-------|
| 27.26 | 416.7 | 28.34 | 286.2 | 28.28 | 270.5 |
| 27.76 | 66.6  |       |       |       |       |
| 28.46 | 92.3  |       |       |       |       |
| 28.98 | 229.7 | 29.11 | 155.9 |       |       |
| 30.56 | 68.5  |       |       |       |       |
| 32.84 | 191.5 | 32.31 | 195.1 |       |       |
| 33.78 | 27.3  | 33.13 | 191.9 | 33.16 | 154.6 |
| 34.1  | 109.7 | 34.21 | 422.8 | 34.21 | 482.3 |
| 34.66 | 123.5 |       |       |       |       |

**Table S5.** Relevant peaks in  $\alpha$  forms after 1 month, 1 year and 2 years of storage at 40°C 75% RH with respect to reference from CCDC .

| Alpha CCDC     |                 | At preparation |                 | After 1 month  |                 | After 1 year   |                 | After 2 years  |                 |
|----------------|-----------------|----------------|-----------------|----------------|-----------------|----------------|-----------------|----------------|-----------------|
| 2 $\theta$ (°) | Intensity (cps) |
| 8.91           | 114.7           |                |                 |                |                 | 9.18           | 113.2           |                |                 |
| 10.45          | 75.5            |                |                 |                |                 |                |                 |                |                 |
| 13.17          | 373             | 13.5           | 253.1           | 13.98          | 183.6           | 13.38          | 230.8           | 13.9           | 292.1           |
|                |                 |                |                 | 14.65          | 154             |                |                 |                |                 |
| 16.77          | 1000            | 17.1           | 659.6           | 17.52          | 1000            | 16.95          | 1000            | 17.5           | 1000            |
| 18.23          | 764.9           | 18.55          | 188.4           |                |                 | 18.6           | 169.2           | 18.95          | 655.4           |
| 19.35          | 612             | 19.7           | 1000            |                |                 | 19.8           | 441.5           |                |                 |
| 19.91          | 691.8           | 20.25          | 973.2           | 19             | 300.9           |                |                 |                |                 |
| 20.17          | 56.4            |                |                 | 20.18          | 468.3           |                |                 | 20.08          | 628             |
| 20.85          | 614.8           | 21.15          | 462.9           | 20.7           | 425.3           | 21             | 749.2           | 20.63          | 717.4           |
|                |                 |                |                 | 21.55          | 385.1           |                |                 | 21.5           | 897.6           |
| 23.95          | 13.8            |                |                 |                |                 |                |                 | 23.6           | 201.7           |
| 24.63          | 328.7           | 24.95          | 142.6           | 25.43          | 181.6           |                |                 |                |                 |
| 25.19          | 53.4            |                |                 |                |                 | 25.33          | 76.1            | 25.33          | 299.5           |
| 25.79          | 33.6            |                |                 | 26.08          | 79.6            |                |                 |                |                 |
| 26.51          | 278.9           | 26.8           | 27.1            |                |                 |                |                 |                |                 |
| 27.03          | 170.4           |                |                 | 27.3           | 164.5           | 27.2           | 192.2           | 27.2           | 281.7           |
| 27.65          | 419.9           | 27.35          | 197.1           |                |                 | 27.98          | 104.9           | 27.73          | 231.3           |
| 28.15          | 80.9            | 27.95          | 192             | 27.8           | 110.2           |                |                 | 28.33          | 326.2           |
| 30.09          | 65.8            | 30.2           | 114.6           |                |                 | 30.83          | 76.8            |                |                 |
| 30.57          | 43.8            | 31.3           | 121.4           | 28.4           | 134.2           |                |                 |                |                 |
| 31.11          | 64.4            | 32.95          | 217.4           |                |                 |                |                 | 31.73          | 130             |
| 32.65          | 294.7           | 33.75          | 141.5           | 33.43          | 208.9           |                |                 |                |                 |
| 33.45          | 232.7           |                |                 | 34.23          | 139.2           |                |                 | 33.33          | 381.5           |
| 35.07          | 117.5           |                |                 |                |                 |                |                 | 34.13          | 348.7           |

**Table S6.** Relevant peaks in  $\delta$  forms after 1 month, 1 year and 2 years of storage at 40°C 75% RH with respect to reference from CCDC .

| Delta CCDC     |                 | At preparation |                 | After 1 month  |                 | After 1 year   |                 | After 2 years  |                 |
|----------------|-----------------|----------------|-----------------|----------------|-----------------|----------------|-----------------|----------------|-----------------|
| 2 $\theta$ (°) | Intensity (cps) |
| 9.35           | 773.3           | 9.33           | 1000            |                |                 | 9.7            | 1000            | 10.08          | 482.6           |
|                |                 |                |                 |                |                 |                |                 | 10.88          | 30.5            |
|                |                 |                |                 | 13.95          | 66.5            |                |                 | 15.08          | 49              |
|                |                 |                |                 | 18.05          | 130.5           |                |                 | 19.2           | 158.1           |
| 19.11          | 110.6           | 19.05          | 341.1           | 18.75          | 160.6           |                |                 | 19.9           | 163.8           |
| 19.47          | 82              | 19.98          | 847.3           | 19.7           | 1000            | 19.47          | 262.7           | 20.83          | 1000            |
| 20.07          | 1000            |                |                 |                |                 |                |                 |                |                 |
| 20.35          | 89.1            |                |                 |                |                 |                |                 |                |                 |
| 20.75          | 343.8           | 20.7           | 262.4           | 20.43          | 256.1           | 20.37          | 906.9           | 21.52          | 303.3           |
| 20.91          | 306.6           |                |                 |                |                 |                |                 |                |                 |
| 21.75          | 330             | 21.65          | 390.9           | 21.38          | 451.2           | 21.04          | 403.2           | 22.5           | 412.6           |
| 22.39          | 44.2            | 22.3           | 37.4            | 22.65          | 211.2           | 22.02          | 379.1           | 23.2           | 33.8            |

|       |       |       |       |       |       |       |       |       |       |
|-------|-------|-------|-------|-------|-------|-------|-------|-------|-------|
| 22.55 | 22.8  |       |       |       |       | 22.62 | 48    | 23.85 | 183.7 |
| 24.33 | 411.1 | 24.25 | 532.4 | 23.95 | 602.2 | 24.64 | 578.7 | 25.08 | 516.7 |
| 25.05 | 378.4 | 24.85 | 520.8 | 24.58 | 320.6 | 25.2  | 529.7 | 25.68 | 388.2 |
| 27.55 | 138.4 | 27.45 | 200.1 | 27.15 | 249.3 | 27.85 | 178.2 | 28.3  | 183.1 |
| 28.19 | 11.8  | 28    | 15.4  | 27.52 | 58.1  | 28.5  | 22.5  | 29.9  | 83.2  |
| 29.01 | 23.5  | 28.95 | 57.2  | 28.73 | 129.2 | 29.37 | 38.8  | 32.5  | 59.9  |
| 31.83 | 44.6  | 31.68 | 80.3  | 31.4  | 60.3  | 32.02 | 78.8  | 34.02 | 69.6  |
|       |       |       |       | 32.85 | 77.4  |       |       |       |       |
| 34.63 | 100.7 | 34.55 | 120.1 | 34.25 | 170.6 |       |       |       |       |
| 34.95 | 92.4  | 34.88 | 52.3  |       |       |       |       |       |       |
